# Supplementary material for: Interleukin-12 bypasses common gamma-chain signalling in emergency natural killer cell lymphopoiesis
Source: PubMed Central journal article supplement (PMC5172358; doi:10.1038/ncomms13708), 2016-12-16
Supplement: ncomms13708-s1.pdf [file ncomms13708-s1.pdf]

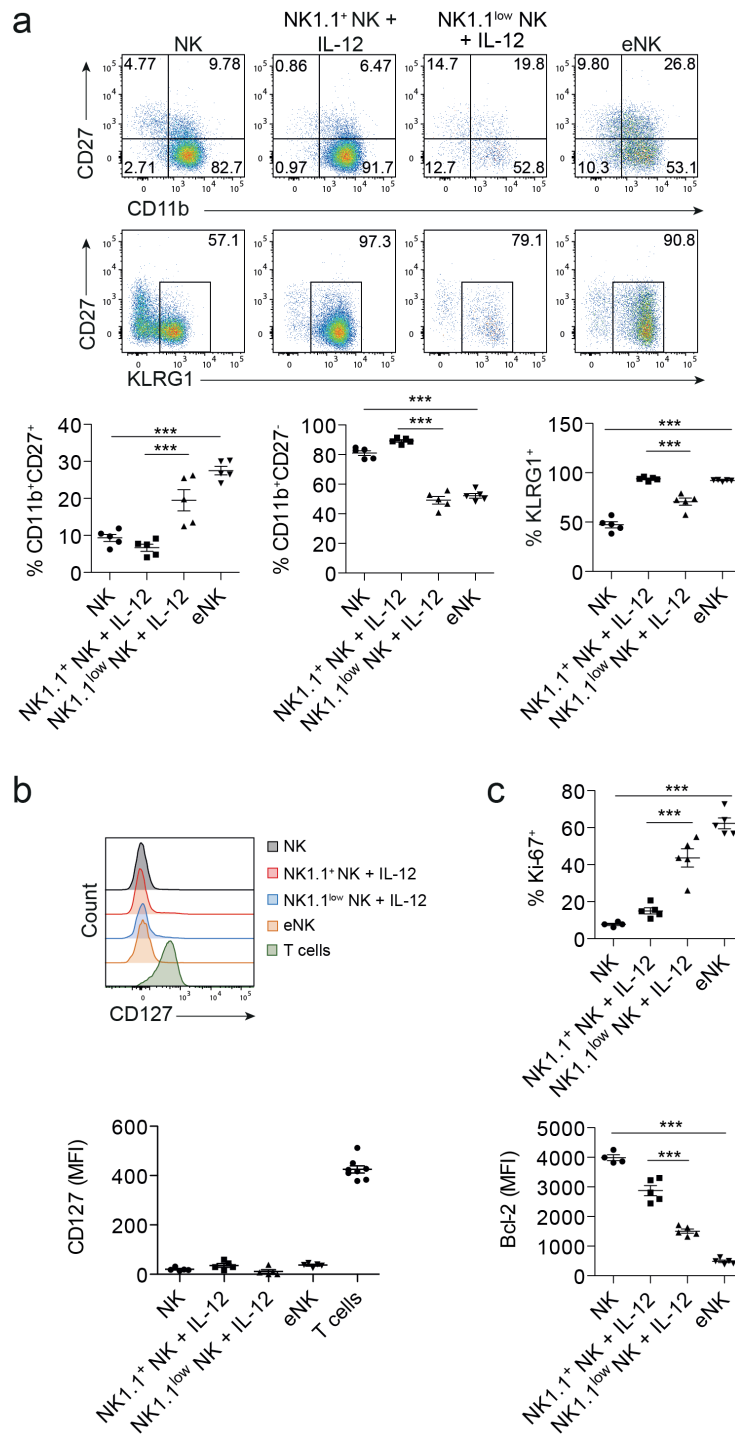

**Supplementary Figure 1: (a)** Expression levels of CD27, CD11b and KLRG1 on the NK1.1<sup>+</sup> subsets of CD45<sup>+</sup>CD3<sup>-</sup>CD122<sup>+</sup>CD49b<sup>+</sup> cells isolated from lungs of Ctrl (NK) and IL-12-treated WT mice (NK1.1<sup>+</sup> NK + IL-12), the NK1.1<sup>low</sup> subset of CD45<sup>+</sup>CD3<sup>-</sup>CD122<sup>+</sup>CD49b<sup>+</sup> cells isolated from lungs of IL-12-treated WT mice (NK1.1<sup>low</sup> NK + IL-12) and eNK cells from *Rag2*<sup>-/-</sup>*Il2rg*<sup>-/-</sup> mice. Three independent

experiments were performed with at least 3 mice per group. **(b)** Representative histograms and quantification of CD127 expression levels in lung NK, NK1.1<sup>+</sup> NK + IL-12, NK1.1<sup>low</sup> NK + IL-12 and eNK cells. Data shown represent two independent experiments. **(c)** Ki-67 and Bcl-2 expression levels were quantified in lung NK, NK1.1<sup>+</sup> NK + IL-12, NK1.1<sup>low</sup> NK + IL-12 and eNK cells. Data shown represent three independent experiments (n = 3-5 mice per group per experiment). Data are expressed as mean  $\pm$  s.e.m. \*\*\* $p < 0.001$  as determined by one-way ANOVA with Bonferroni post-test.

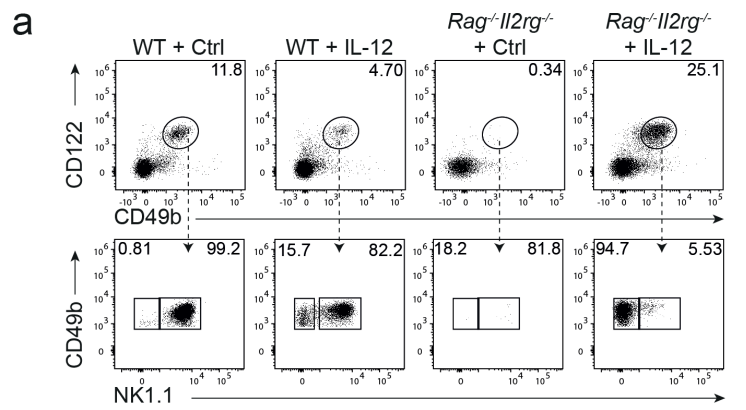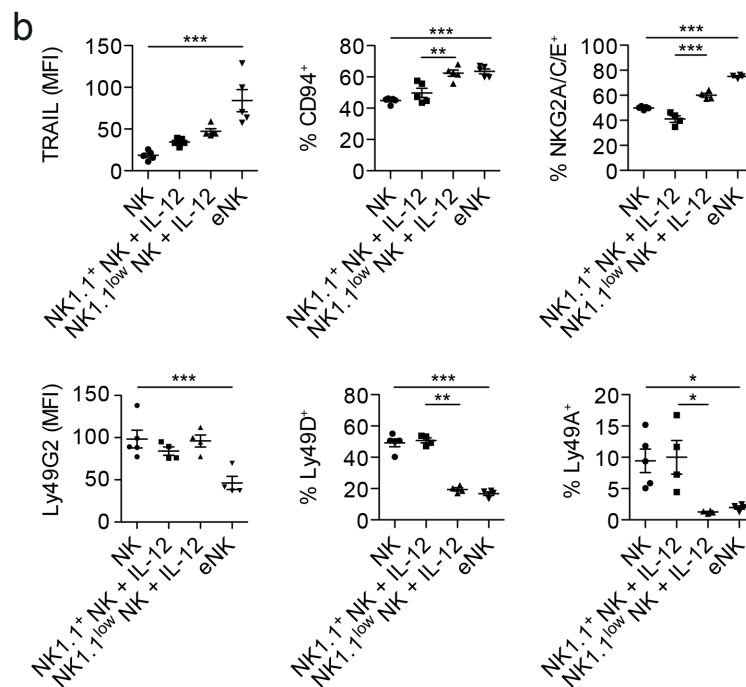

**Supplementary Figure 2: (a)** Representative plots of CD45<sup>+</sup>CD3<sup>-</sup>CD122<sup>+</sup>CD49b<sup>+</sup> cells in livers from IL-12 or Ctrl-treated WT or *Rag2<sup>-/-</sup>Il2rg<sup>-/-</sup>* mice. The expression of NK1.1 on CD45<sup>+</sup>CD3<sup>-</sup>CD122<sup>+</sup>CD49b<sup>+</sup> cells in livers from IL-12 or Ctrl-treated WT or *Rag2<sup>-/-</sup>Il2rg<sup>-/-</sup>* mice is shown. Data represent two experiments (n ≥ 4 mice per group per experiment). **(b)** Quantification of TRAIL, CD94, NKG2A/C/E, Ly49G2, Ly49D and Ly49A expression on lung NK, NK1.1<sup>+</sup> versus NK1.1<sup>low</sup> NK + IL-12 and eNK cells. Two independent experiments were performed with at least 3-5 mice per group. Data are expressed as mean ± s.e.m. One-way ANOVA was used to determine significance (\*p < 0.05, \*\*p < 0.01, \*\*\*p < 0.001).

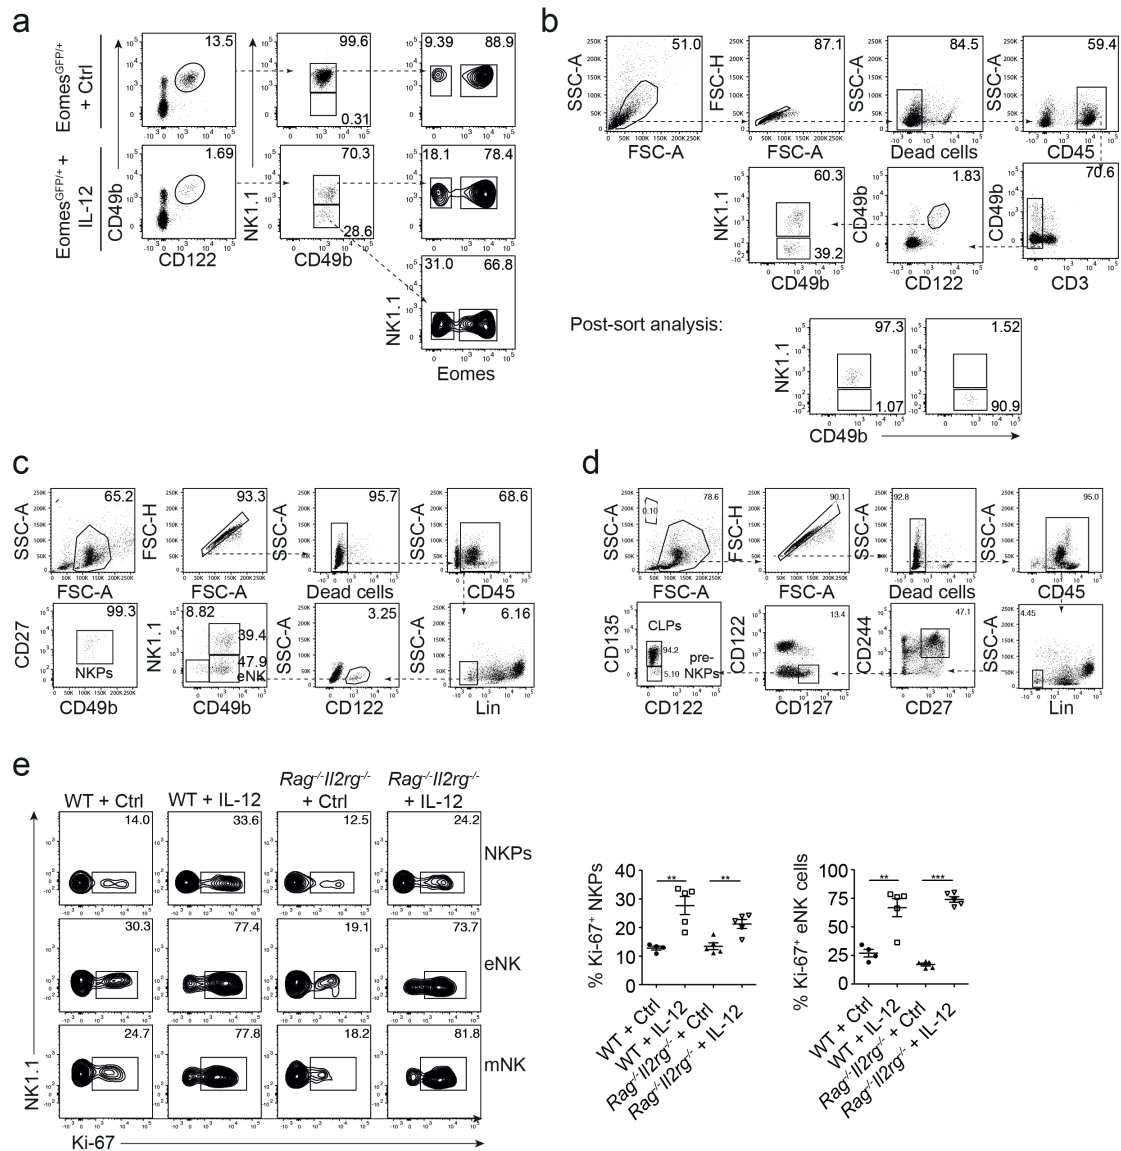

**Supplementary Figure 3:** (a) Eomes expression by CD122<sup>+</sup>CD49b<sup>+</sup>NK1.1<sup>+</sup> or CD122<sup>+</sup>CD49b<sup>+</sup>NK1.1<sup>low</sup> cells in the BM of Ctrl and IL-12-treated C57BL/6 *Eomes*<sup>GFP/+</sup> mice. Data are representative of two independent experiments (n = 3 mice per group per experiment). (b) Sorting strategy and post-sort analysis of CD45<sup>+</sup>CD3<sup>-</sup>CD122<sup>+</sup>CD49b<sup>+</sup>NK1.1<sup>+</sup> or CD45<sup>+</sup>CD3<sup>-</sup>CD122<sup>+</sup>CD49b<sup>+</sup>NK1.1<sup>low</sup> cells from the spleen of IL-12 treated WT mice. (c) Gating strategy for NKPs and eNK cells in the BM is displayed. (d) Gating strategy for CLPs and pre-NKPs in the BM is displayed. (e) Representative plots and quantification of Ki-67 expression by NKPs, eNK and mNK cells isolated from the BM of WT or *Rag2*<sup>-/-</sup>*Il2rg*<sup>-/-</sup> mice treated either with Ctrl

or IL-12. Data represent two independently performed experiments with at least four mice per group each. Data are expressed as mean  $\pm$  s.e.m. (\*\* $p < 0.01$ , \*\*\* $p < 0.001$ , unpaired Student's t-test with or without Welch's correction).

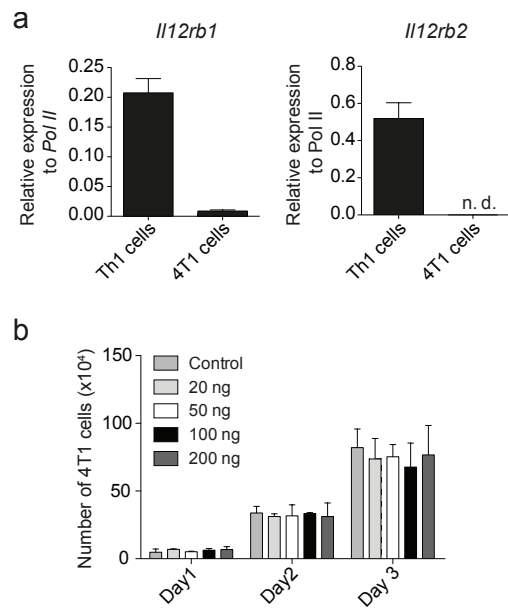

**Supplementary Figure 4: (a)** 4T1 cells were harvested and mRNA expression levels of *Il12rb1* and *Il12rb2* were quantified by qRT-PCR. Representative data of two independent experiments. **(b)** Quantification of 4T1 cells after 1, 2 and 3 days of *in vitro* culture with different concentrations of IL-12. Representative data of two independent experiments. Data are expressed as mean  $\pm$  s.e.m.

## Supplementary Table 1. Expression levels of signature genes in eNK cells compared to NK+IL-12 and NK cells

### Cytokines and Cytokine Receptors

| Gene symbol | FC: NK + IL-12 / |          | NK (1) | NK (2) | NK (3) | NK + IL-12 (1) | NK + IL-12 (2) | NK + IL-12 (3) | eNK (1) | eNK (2) |
|-------------|------------------|----------|--------|--------|--------|----------------|----------------|----------------|---------|---------|
|             | eNK              | pValue   |        |        |        |                |                |                |         |         |
| Il1rl1      | -2,761           | 6.07e-09 | 95.77  | 51.32  | 226.5  | 422.8          | 300.2          | 147.6          | 1776    | 2204    |
| Tnf         | -2,719           | 6.50E-05 | 84.82  | 23.49  | 381.5  | 166.3          | 136.1          | 271.3          | 1742    | 813.8   |
| Ltb         | -2,574           | 9.67E-11 | 10640  | 5738   | 4080   | 3515           | 4079           | 3941           | 30320   | 16170   |
| Il2ra       | -1.92            | 0.00018  | 9,577  | 50.45  | 82.67  | 460.4          | 510.8          | 183.2          | 948.7   | 1987    |
| Csf2        | -1,725           | 2.49e-08 | 206.6  | 116.6  | 73.19  | 2211           | 2349           | 3402           | 9595    | 8132    |
| Il18r1      | -0.9109          | 0.002915 | 3219   | 2874   | 3086   | 2031           | 2054           | 1783           | 3558    | 3873    |
| Il15ra      | -0.362           | 0.4643   | 333.8  | 261.8  | 323.8  | 527.3          | 376.9          | 698.2          | 956.1   | 437.5   |
| Il18bp      | -0.3459          | 0.4421   | 153.2  | 90.46  | 57.69  | 503            | 584.3          | 488.2          | 818.1   | 535.6   |
| Il16        | -0.07169         | 0.8093   | 4039   | 4887   | 4592   | 3946           | 4123           | 4346           | 5104    | 3705    |
| Ifng        | -0.04259         | 0.8996   | 2816   | 2472   | 1851   | 11570          | 10120          | 16810          | 13900   | 12780   |
| Ifnar2      | -0.03856         | 0.9182   | 2318   | 1315   | 1330   | 1021           | 1185           | 1018           | 1211    | 1023    |
| Tgfb2       | 0.2415           | 0.5334   | 2256   | 2373   | 3692   | 3548           | 2844           | 1541           | 1953    | 2567    |
| Ifnar1      | 0.3271           | 0.498    | 759.3  | 2635   | 3450   | 3396           | 3287           | 1152           | 1256    | 2937    |
| Il10        | 0.3276           | 0.2972   | 1,368  | 0.8698 | 14.64  | 7080           | 5802           | 8688           | 6522    | 5066    |
| Il12rb1     | 0.3559           | 0.3231   | 640.3  | 1144   | 925.7  | 2995           | 2431           | 2326           | 1462    | 2603    |
| Il10ra      | 0.473            | 0.2035   | 2639   | 3426   | 2867   | 2561           | 2472           | 1430           | 1522    | 1618    |
| Il17ra      | 0.5883           | 0.1502   | 1783   | 6605   | 8373   | 7136           | 8244           | 4496           | 2578    | 6286    |
| Il2rb       | 0.5901           | 0.149    | 17480  | 27260  | 32680  | 49810          | 44570          | 46140          | 22790   | 39840   |
| Il10rb      | 0.6108           | 0.05025  | 4245   | 7196   | 6732   | 4404           | 4406           | 5774           | 3722    | 2721    |
| Ifngr1      | 0.6462           | 0.06182  | 12640  | 16340  | 22060  | 15750          | 16650          | 23700          | 12230   | 11880   |
| Il12rb2     | 0.7954           | 0.08026  | 1447   | 3885   | 5682   | 9608           | 8818           | 4041           | 2399    | 6283    |
| Il27ra      | 0.9916           | 0.001529 | 1082   | 2956   | 2568   | 3599           | 4657           | 4506           | 2058    | 2261    |

### Chemokines and Chemokine Receptors

| Gene symbol | FC: NK + IL-12 / |           | NK (1) | NK (2) | NK (3) | NK + IL-12 (1) | NK + IL-12 (2) | NK + IL-12 (3) | eNK (1) | eNK (2) |
|-------------|------------------|-----------|--------|--------|--------|----------------|----------------|----------------|---------|---------|
|             | eNK              | pValue    |        |        |        |                |                |                |         |         |
| Cxcl15      | -2,749           | 3,41E-04  | 1687   | 291.4  | 1470   | 162.2          | 79.92          | 89.13          | 749.2   | 754.4   |
| Cxcr6       | -2,231           | 8,34E-09  | 134.1  | 104.4  | 457.2  | 2664           | 3486           | 2801           | 17900   | 10540   |
| Cxcr3       | -1,907           | 2,34E-04  | 1027   | 1237   | 582.1  | 545.5          | 565.9          | 709.1          | 2680    | 1929    |
| Cxcr4       | -1,474           | 0.05577   | 648.5  | 366.2  | 812    | 257.6          | 76.68          | 414.9          | 145.2   | 1237    |
| S1pr1       | -1,373           | 0.0002152 | 5514   | 1371   | 5354   | 627.7          | 623.2          | 852.6          | 1744    | 1920    |
| Xcl1        | -1,262           | 7,10E-02  | 3500   | 915.1  | 431.4  | 1621           | 1737           | 2537           | 4775    | 4736    |
| Ccl6        | -0.8596          | 0.0477    | 4522   | 1161   | 3268   | 568.9          | 504.4          | 835.8          | 863.1   | 1458    |
| Mif         | -0.7993          | 0.06257   | 1590   | 527.1  | 305.7  | 452.3          | 463.3          | 559.5          | 992.6   | 739.7   |
| S1pr4       | -0.2305          | 0.4259    | 4266   | 6253   | 4795   | 4201           | 4644           | 4770           | 5729    | 5039    |
| Ccr5        | 0.2376           | 0.5176    | 1961   | 3489   | 5491   | 14160          | 13110          | 11820          | 7303    | 14920   |
| Ccr2        | 0.5095           | 0.1311    | 2929   | 6018   | 5340   | 6965           | 8060           | 4927           | 3874    | 5554    |
| Cx3cr1      | 1,282            | 0.0001259 | 773    | 512.3  | 1343   | 11230          | 8912           | 8338           | 3213    | 4659    |
| S1pr5       | 1,914            | 1,22E-05  | 13970  | 17300  | 15730  | 14670          | 14940          | 18520          | 4554    | 4049    |
| Ccl4        | 1,925            | 1,25E-02  | 118900 | 33200  | 24910  | 34920          | 33670          | 65010          | 13300   | 10390   |
| Ccl3        | 2,108            | 3,83E-04  | 46190  | 15510  | 13140  | 12380          | 12820          | 22930          | 4887    | 2654    |
| Ccl9        | 2,21             | 1,81E-03  | 1118   | 581.9  | 471    | 857.9          | 1109           | 1311           | 219.4   | 256.6   |
| Ccl5        | 2,762            | 9,42E-05  | 593800 | 146300 | 95150  | 167700         | 185900         | 255700         | 37360   | 23300   |

### Fc receptors and adhesion molecules

| Gene symbol | FC: NK + IL-12 / |          | NK (1) | NK (2) | NK (3) | NK + IL-12 (1) | NK + IL-12 (2) | NK + IL-12 (3) | eNK (1) | eNK (2) |
|-------------|------------------|----------|--------|--------|--------|----------------|----------------|----------------|---------|---------|
|             | eNK              | pValue   |        |        |        |                |                |                |         |         |
| Fcgrt       | -2,279           | 8,06E-05 | 711,4  | 445,4  | 1645   | 59,83          | 151,2          | 203            | 700,1   | 651,9   |
| Cd7         | -1,891           | 3,78E-04 | 11090  | 5438   | 5081   | 6188           | 8185           | 11820          | 38400   | 27110   |
| Fcgr3       | -1,169           | 0,001722 | 3195   | 1271   | 1723   | 1026           | 857,5          | 1105           | 2917    | 1628    |
| Cd2         | -1,134           | 0,003467 | 48110  | 15950  | 13690  | 9556           | 14590          | 14080          | 38400   | 18390   |
| Cd69        | -1,131           | 0,00207  | 1764   | 1940   | 1850   | 5742           | 5504           | 10810          | 13590   | 18790   |
| Cd27        | -0,9547          | 0,008032 | 1379   | 1268   | 948.9  | 994.8          | 1409           | 986.3          | 2518    | 1920    |
| Fcgr2b      | -0,6953          | 0,07681  | 1524   | 1949   | 1627   | 837,6          | 830,5          | 778,4          | 1661    | 1018    |
| Itga1       | -0,6115          | 0,2027   | 291.4  | 123.5  | 3500   | 1316           | 1177           | 532.8          | 931     | 2172    |
| Itgb1       | -0,2722          | 0,5192   | 5224   | 9952   | 17380  | 13100          | 13630          | 5563           | 9271    | 16940   |
| Cd38        | 0,07408          | 0,8391   | 1260   | 1602   | 2932   | 4998           | 6883           | 3193           | 3945    | 5691    |
| Cd9         | 0,08806          | 0,7794   | 12500  | 6827   | 9416   | 4418           | 5210           | 6042           | 5994    | 3960    |
| Cd84        | 0,1322           | 0,6522   | 4828   | 4273   | 3886   | 5137           | 5510           | 5238           | 4502    | 5250    |
| Itgax       | 0,2318           | 0,4956   | 474.7  | 816.8  | 598.5  | 3344           | 3379           | 2281           | 2156    | 3003    |
| Cd53        | 0,2447           | 0,5199   | 14670  | 15160  | 16570  | 27650          | 32420          | 37600          | 33670   | 21990   |
| Icam1       | 0,4489           | 0,2147   | 3394   | 5657   | 7688   | 16630          | 16200          | 24810          | 11970   | 16370   |
| Itgal       | 0,6143           | 0,1563   | 20170  | 28160  | 30540  | 35240          | 35300          | 19900          | 13380   | 26300   |
| Itgb2       | 0,9716           | 0,02894  | 25800  | 53930  | 50660  | 111500         | 131600         | 115900         | 75400   | 48340   |
| Itga2       | 1,021            | 0,005444 | 1822   | 1840   | 2475   | 2741           | 3986           | 2133           | 1430    | 1514    |
| Fcer1g      | 1,806            | 5,13E-06 | 142900 | 32980  | 21660  | 17550          | 22620          | 25280          | 8371    | 4289    |
| Itgam       | 2,013            | 1,66E-03 | 4542   | 7965   | 8592   | 17560          | 15980          | 7601           | 2841    | 4025    |

### Activating and Inhibitory receptors

| Gene symbol | FC: NK + IL-12 / |          | NK (1) | NK (2) | NK (3) | NK + IL-12 (1) | NK + IL-12 (2) | NK + IL-12 (3) | eNK (1) | eNK (2) |
|-------------|------------------|----------|--------|--------|--------|----------------|----------------|----------------|---------|---------|
|             | eNK              | pValue   |        |        |        |                |                |                |         |         |
| Cd160       | -1,918           | 9,50E-06 | 1501   | 633.2  | 513.2  | 1515           | 1639           | 2698           | 8595    | 6314    |
| Cd226       | -1,531           | 3,89E-03 | 1323   | 1581   | 1888   | 3555           | 3121           | 2201           | 6863    | 10390   |
| Klrb1f      | -0,5571          | 0,0779   | 5332   | 5664   | 4655   | 4720           | 4371           | 6863           | 8951    | 6869    |
| Klrc2       | -0,2126          | 0,5613   | 737.4  | 948.1  | 973.9  | 1185           | 1565           | 1854           | 2119    | 1481    |
| Klrc1       | -0,1763          | 0,5902   | 3032   | 3906   | 4203   | 4844           | 6008           | 7791           | 8576    | 5641    |
| Itgb7       | -0,1405          | 0,6755   | 3022   | 9920   | 10090  | 14790          | 16170          | 18510          | 16140   | 20510   |
| Klrc3       | -0,1307          | 0,7009   | 1126   | 1735   | 1841   | 1911           | 2373           | 2814           | 3213    | 2036    |
| Cd48        | 0,0205           | 0,952    | 7154   | 3296   | 5390   | 11590          | 13440          | 14610          | 16580   | 9835    |
| Cd96        | 0,1672           | 0,6785   | 889.3  | 1743   | 2402   | 831.5          | 927.7          | 1029           | 959.2   | 716.5   |
| Klrg1       | 0,321            | 0,4294   | 15990  | 10850  | 7539   | 30810          | 36070          | 47010          | 39320   | 22280   |
| Klrk1       | 0,3596           | 0,2985   | 17010  | 18400  | 17110  | 20830          | 22760          | 25600          | 20050   | 16310   |
| Klri1       | 0,64             | 0,06052  | 1516   | 2346   | 1816   | 2371           | 2628           | 2493           | 1944    | 1304    |
| Klrd1       | 0,6686           | 0,03603  | 26600  | 14350  | 7139   | 7867           | 8328           | 9221           | 6615    | 4188    |
| Cd244       | 0,6869           | 0,03666  | 8054   | 10770  | 8668   | 15150          | 15020          | 15030          | 11250   | 7719    |
| Ncr1        | 0,7607           | 0,08951  | 104500 | 93090  | 83630  | 125300         | 138900         | 161000         | 98420   | 70900   |
| Klri2       | 0,9705           | 0,001978 | 5816   | 12490  | 12230  | 13450          | 13660          | 13170          | 7269    | 6590    |
| Klra7       | 1,599            | 7,2e-06  | 7332   | 4396   | 3375   | 5357           | 6330           | 6836           | 2744    | 1392    |
| Klre1       | 1,901            | 3,46E-06 | 16530  | 8475   | 5592   | 6250           | 6252           | 7080           | 2066    | 1473    |
| Klra9       | 2,165            | 1,20E-02 | 2259   | 1012   | 664.8  | 800.1          | 1008           | 1180           | 295.7   | 155     |
| Klra3       | 2,243            | 1,35E-06 | 16900  | 8515   | 6672   | 8499           | 9948           | 12210          | 2843    | 1535    |
| Klrb1c      | 2,309            | 5,40E-09 | 14040  | 14780  | 12340  | 7259           | 8816           | 10630          | 1992    | 1641    |
| Klra1       | 2,947            | 1,34E-07 | 1536   | 810.7  | 641.5  | 1146           | 1253           | 1497           | 175.5   | 164.5   |
| klra4       | 4,068            | 3,85E-07 | 276,6  | 130,4  | 394,6  | 217,4          | 226,5          | 225,7          | 18,19   | 0       |
| klra6       | 2,736            | 0,00122  | 98,77  | 89,96  | 217,5  | 179,2          | 157,8          | 129,7          | 36,38   | 0       |

### Effector molecules

| Gene symbol | FC: NK + IL-12 / |          | NK (1) | NK (2) | NK (3) | NK + IL-12 (1) | NK + IL-12 (2) | NK + IL-12 (3) | eNK (1) | eNK (2)  |
|-------------|------------------|----------|--------|--------|--------|----------------|----------------|----------------|---------|----------|
|             | eNK              | pValue   |        |        |        |                |                |                |         |          |
| Tnfrsf10    | -1,669           | 0,005336 | 128.6  | 100    | 576.9  | 489.8          | 565.9          | 99.03          | 948.7   | 1525     |
| Gzmk        | -0,4332          | 0,2772   | 451.5  | 236.6  | 350.5  | 896.4          | 816.5          | 973.5          | 1547    | 905.1    |
| Fasl        | 0,7925           | 0,02776  | 13950  | 18320  | 20990  | 25880          | 24630          | 33750          | 16320   | 16420    |
| Gzma        | 1,188            | 0,02575  | 862400 | 238600 | 160300 | 285200         | 341200         | 417300         | 209900  | 1,00E+05 |
| Prf1        | 2,375            | 7,91E-04 | 29410  | 71040  | 71320  | 167700         | 200200         | 200400         | 38170   | 36590    |
| Gzmb        | 4,607            | 8,47E-23 | 33290  | 26010  | 17940  | 25970          | 26120          | 35660          | 1457    | 973.1    |

### Transcription factors

| Gene symbol | FC: NK + IL-12 / |           | NK (1) | NK (2) | NK (3) | NK + IL-12 (1) | NK + IL-12 (2) | NK + IL-12 (3) | eNK (1) | eNK (2) |
|-------------|------------------|-----------|--------|--------|--------|----------------|----------------|----------------|---------|---------|
|             | eNK              | pValue    |        |        |        |                |                |                |         |         |
| Rora        | -2,22            | 9,18E-06  | 262.7  | 760.2  | 684.6  | 753.4          | 612.4          | 1180           | 3018    | 4932    |
| Nfkb1       | -1,172           | 0,0001173 | 1427   | 2376   | 1509   | 3619           | 3130           | 4056           | 9771    | 6673    |
| Arntl       | -0,8437          | 0,05393   | 198.4  | 832.4  | 765.5  | 870            | 389.9          | 687.3          | 1154    | 1200    |
| Foxo1       | -0,366           | 0,3347    | 1350   | 681.1  | 425.4  | 962.3          | 894.2          | 1297           | 1563    | 1178    |
| Runx1       | -0,2989          | 0,3271    | 1725   | 2439   | 1660   | 2904           | 3146           | 2972           | 3181    | 4280    |
| Nfatc3      | -0,2436          | 0,487     | 1560   | 1851   | 1510   | 1487           | 1414           | 1303           | 1885    | 1475    |
| Ets1        | -0,1468          | 0,6728    | 4511   | 10350  | 8965   | 9253           | 8517           | 5303           | 6916    | 10270   |
| Tox         | -0,1394          | 0,6493    | 602    | 1371   | 1085   | 2459           | 3042           | 3161           | 3279    | 3148    |
| Klf13       | -0,1191          | 0,696     | 10950  | 10890  | 8026   | 5754           | 7534           | 6701           | 8421    | 6236    |
| Foxn2       | -0,07505         | 0,8843    | 736.1  | 999.5  | 1744   | 1331           | 1834           | 570.4          | 755.4   | 1885    |
| Gata3       | 0,0728           | 0,8259    | 2750   | 4504   | 3530   | 3447           | 3806           | 3915           | 4690    | 2494    |
| Eomes       | 0,1198           | 0,7048    | 6583   | 5350   | 2649   | 2807           | 2425           | 3391           | 2874    | 2472    |
| Foxp1       | 0,1463           | 0,6317    | 2498   | 2743   | 3671   | 3232           | 3012           | 2823           | 2820    | 2702    |
| Stat1       | 0,1647           | 0,6518    | 1684   | 7177   | 7653   | 18780          | 23840          | 14160          | 14850   | 19250   |
| Klf2        | 0,1756           | 0,6414    | 9142   | 3091   | 1141   | 1477           | 1475           | 1747           | 1806    | 1008    |
| Tcf3        | 0,1914           | 0,6762    | 1142   | 1287   | 694.9  | 812.2          | 727.9          | 523.9          | 771.1   | 453     |
| Nfkb2       | 0,2648           | 0,5076    | 439.2  | 1455   | 1293   | 2478           | 1474           | 1622           | 1117    | 1997    |
| Id2         | 0,2874           | 0,4755    | 36560  | 28700  | 16880  | 45640          | 45550          | 61960          | 50120   | 34560   |
| Stat4       | 0,3696           | 0,2303    | 4985   | 11040  | 11530  | 6043           | 8724           | 7627           | 5704    | 5967    |
| Tbx21       | 0,6087           | 0,1093    | 9132   | 27230  | 25870  | 37200          | 46050          | 46610          | 30730   | 26680   |
| Nfil3       | 1,452            | 0,009795  | 1060   | 1275   | 712.1  | 1353           | 604.8          | 1441           | 206.9   | 621.8   |
